# Supplementary material
Source: Royal Society of Chemistry journal article supplement (doi:10.1039/d6ma00556j)
Supplement: d6ma00556j1.pdf [file d6ma00556j1.pdf]

# Supporting Information

## **Green Biosynthesis of Silver Nanoflowers Using *Tithonia diversifolia* Leaf Extract: In Vitro Anticancer Activity, Antimetastatic Effects, and Crystal Violet Photodegradation**

Suganya Ganesan<sup>1,3</sup>, Aswathy Karanath-Anilkumar<sup>2,3</sup>, Jerome Rajendran<sup>4\*</sup> and Ganesh Munuswamy-Ramanujam<sup>1,3\*</sup>

<sup>1</sup> *Department of Chemistry, College of Science and Humanities, SRM Institute of Science & Technology, Kattankulathur, Chengalpattu 603203, India*

<sup>2</sup> *Department of Biotechnology, College of Engineering and Technology, SRM Institute of Science & Technology, Kattankulathur, Chengalpattu 603203, India*

<sup>3</sup> *Interdisciplinary Institute of Indian System of Medicine, SRM Institute of Science & Technology, Kattankulathur, Chengalpattu 603203, India*

<sup>4</sup> *Department of Electrical Engineering and Computer Science, University of California Irvine, CA, USA*

\*Corresponding Authors

Jerome Rajendran, Email: [jeromestil@gmail.com](mailto:jeromestil@gmail.com), [rajendrj@uci.edu](mailto:rajendrj@uci.edu); ORCID: 0000-0001-8235-6382

Ganesh Munuswamy Ramanujam, Email: [mrganesh2000@hotmail.com](mailto:mrganesh2000@hotmail.com), [ganeshm1@srmist.edu.in](mailto:ganeshm1@srmist.edu.in); ORCID: 0000-0001-8021-601X

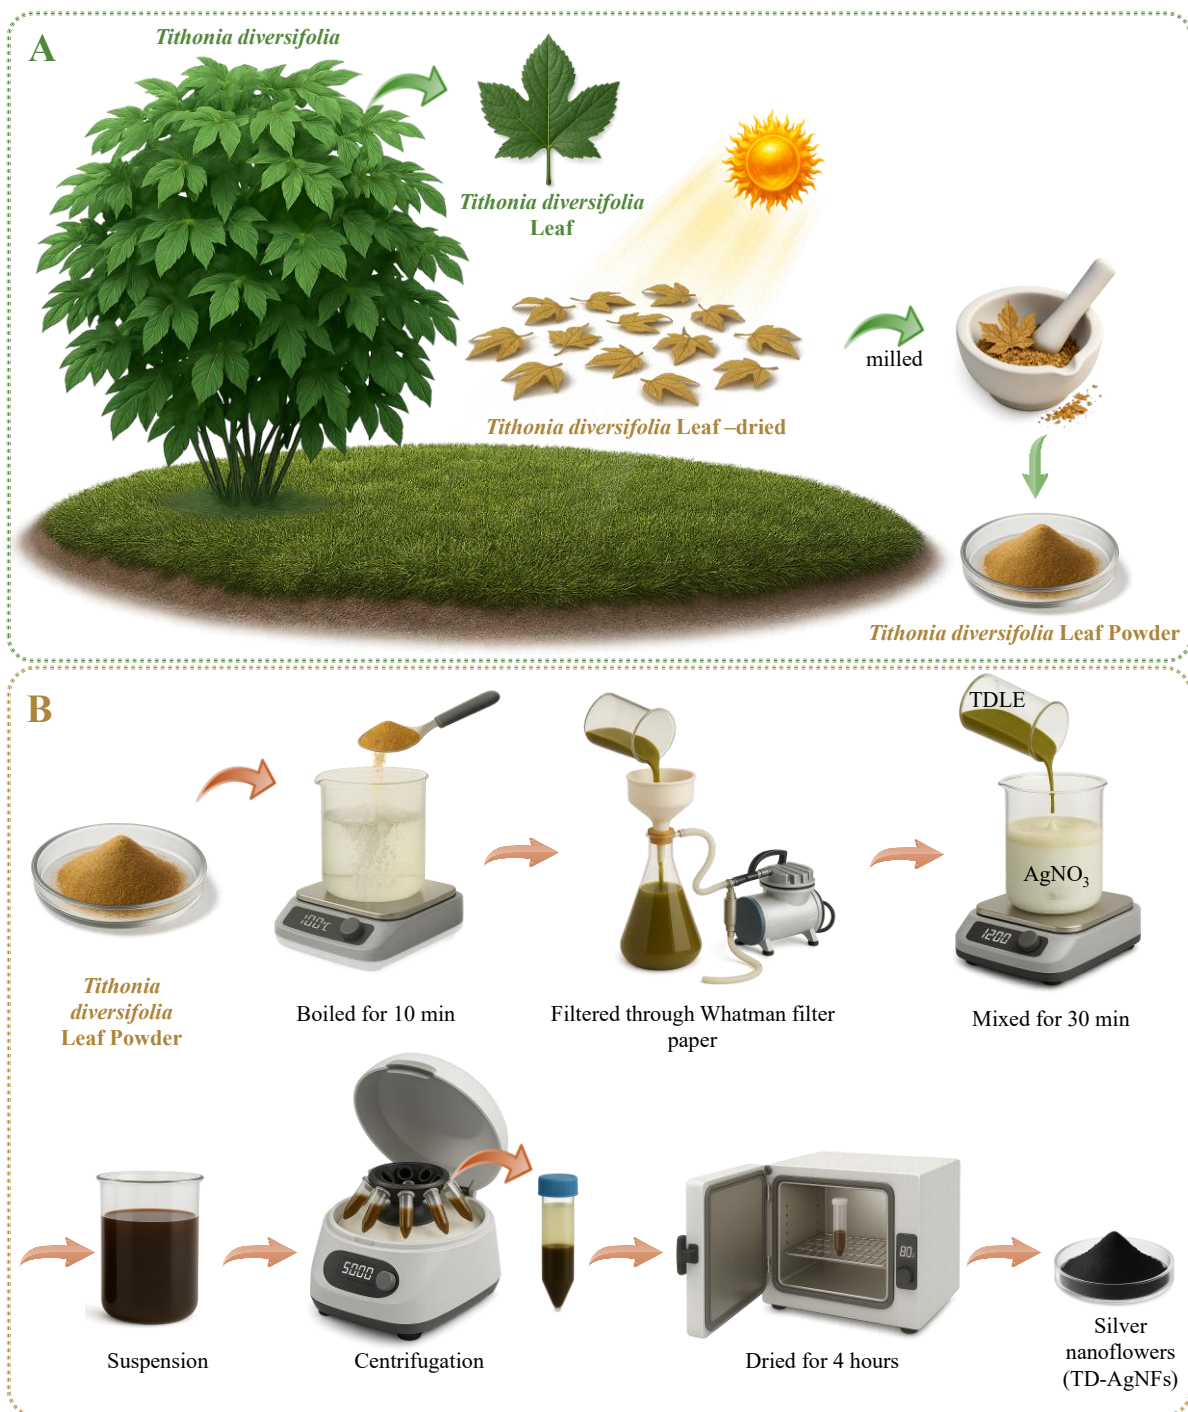

**Supporting Fig. 1. Green synthesis of silver nanoflowers (AgNFs) using *Tithonia diversifolia* leaf extract (TDLE).** (A) Preparation of plant precursor: *T. diversifolia* leaves were sun-dried and milled to a fine powder. (B) Synthesis scheme: the leaf powder was boiled in water for 10 min and filtered through Whatman paper to obtain TDLE; the extract was mixed with aqueous AgNO<sub>3</sub> for 30 min to reduce Ag<sup>+</sup>, producing a brown suspension; the product was collected by centrifugation and washing, then dried at 60 °C for 4 h to yield TD-AgNFs.

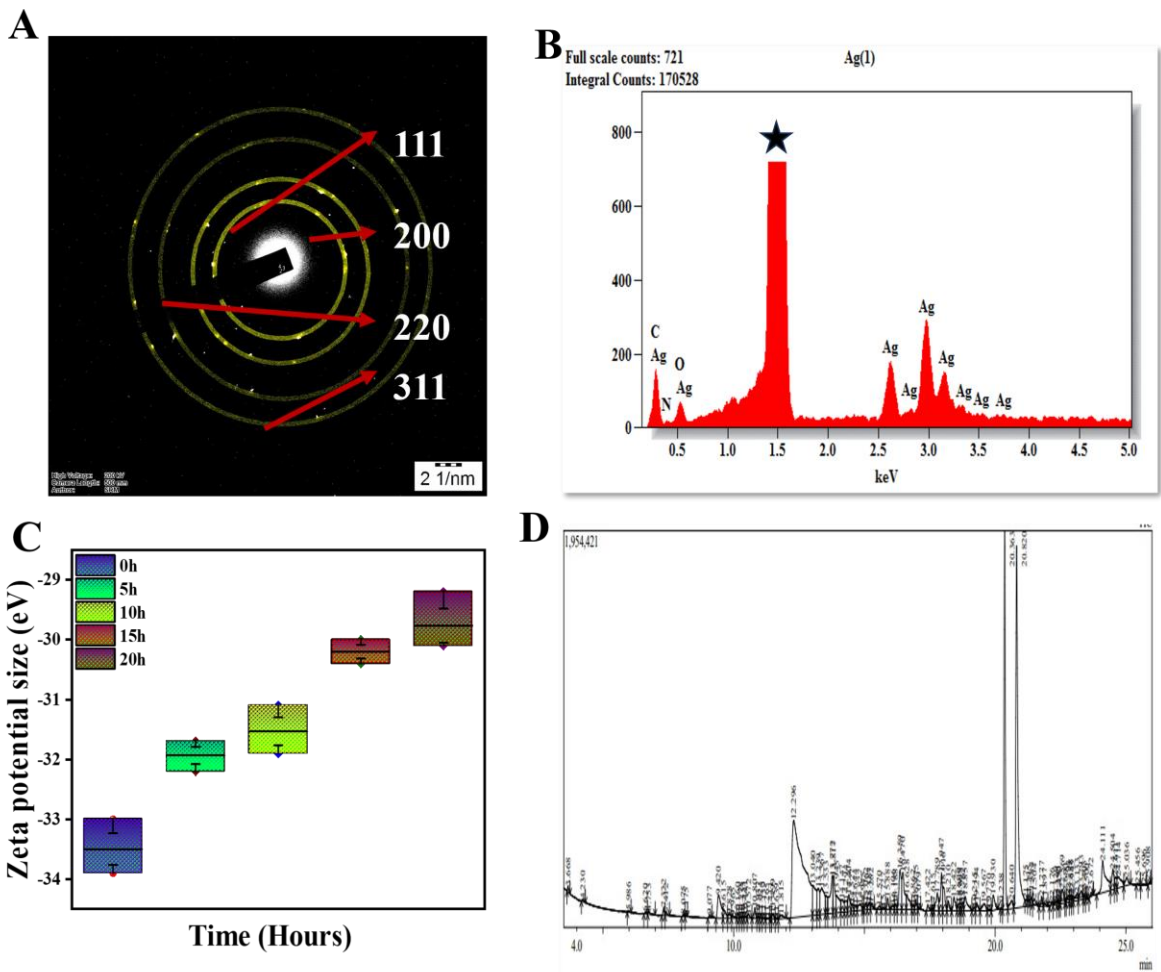

**Supporting Fig. 2. Additional characterization of TD-AgNFs.** (A) Selected area electron diffraction (SAED) pattern of TD-AgNFs, showing diffraction rings indexed to the crystalline Ag planes. (B) Energy-dispersive X-ray (EDX) spectrum of TD-AgNFs, confirming the elemental presence of silver. (C) Time-dependent zeta potential measurements of TD-AgNFs. (D) GC-MS chromatogram of *Tithonia diversifolia* leaf extract (TDLE).

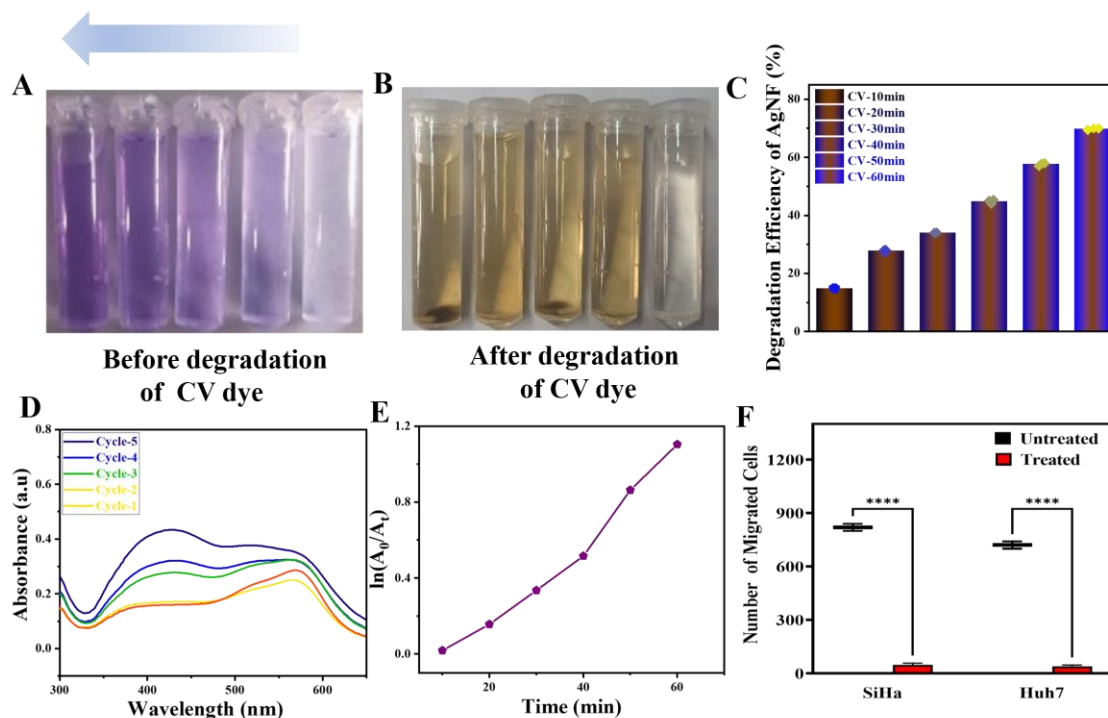

**Supporting Fig. 3. Additional evidence for crystal violet (CV) photocatalytic degradation and anti-migratory activity of TD-AgNFs.** (A) Photographs of CV solutions before degradation, showing the characteristic violet color across increasing dye concentrations. (B) Corresponding images after TD-AgNF-mediated photocatalytic treatment, showing progressive decolorization. (C) Time-dependent CV degradation efficiency in the presence of TD-AgNFs (10–60 min). (D) UV–Vis absorbance spectra recorded over successive reuse cycles (Cycles 1–5) for evaluating TD-AgNF reusability. (E) Kinetic plot of CV degradation expressed as  $\ln(A_0/A_t)$  versus irradiation time (0–60 min). (F) Quantification of Transwell migration in SiHa and Huh7 cells, showing reduced numbers of migrated cells in TD-AgNF-treated groups relative to untreated controls.

**Table S1.** Comparison of the present TD-AgNFs system with recently reported green-synthesized Ag-based nanoparticles/nanostructures.

| No. | Nanoparticle / composition     | Reported structure / morphology                                                     | Plant / green source used                    | Applications evaluated                                                                                                                   | Key performance / highlights                                                                                                                                                                                                                                                                                                                                                           | Ref          |
|-----|--------------------------------|-------------------------------------------------------------------------------------|----------------------------------------------|------------------------------------------------------------------------------------------------------------------------------------------|----------------------------------------------------------------------------------------------------------------------------------------------------------------------------------------------------------------------------------------------------------------------------------------------------------------------------------------------------------------------------------------|--------------|
| 1   | <b>TD-AgNFs, present study</b> | Hierarchical flower-like Ag nanoflowers; petal-like Ag plates; mesoporous structure | <i>Tithonia diversifolia</i> leaf extract    | Anticancer, in vitro anti-migratory activity, antimicrobial/antifungal activity, antioxidant/ROS response, crystal violet decolorization | BET surface area <b>36.7 m<sup>2</sup> g<sup>-1</sup></b> ; IC <sub>50</sub> values <b>0.16, 0.23, and 0.26 mg mL<sup>-1</sup></b> for Huh7, THP-1, and SiHa; <b>migration inhibition</b> at 50 μg mL <sup>-1</sup> ; <b>crystal violet decolorization; hierarchical AgNF platform; multi-application validation; BET-supported mesoporosity; biomedical–environmental integration</b> | Present work |
| 2   | AgNFs                          | Flower-like Ag nanostructures                                                       | <i>Kalanchoe daigremontiana</i> leaf extract | Photocatalytic and antibacterial activity                                                                                                | Green-synthesized Ag nanoflowers showed enhanced antibacterial activity against <i>E. coli</i> and <i>S. aureus</i> and photocatalytic performance; limited biological scope; no anticancer/anti-migratory evaluation                                                                                                                                                                  | <sup>1</sup> |
| 3   | AgNPs                          | Ag nanoparticles                                                                    | <i>Magnolia alba</i> leaf extract            | Antimicrobial, antifungal, antiviral, anticancer, antioxidant, photocatalytic activity                                                   | Evaluated against multiple bacterial strains, <i>Candida albicans</i> , HCT-116 colon cancer cells, DPPH/FRAP-based antioxidant activity, and methyl orange dye photocatalysis; AgNP morphology; no nanoflower architecture; no migration assay                                                                                                                                        | <sup>2</sup> |
| 4   | AgNPs                          | Irregular/rugged spherical nanoparticles                                            | <i>Stachys tibetica</i> extract              | Antioxidant, antimicrobial, photocatalytic activity                                                                                      | Rhodamine B degraded under sunlight within <b>1 h</b> ; rate constant <b>0.066 min<sup>-1</sup></b> ; active against <i>Bacillus cereus</i> , <i>Pseudomonas</i> , <i>E. coli</i> , and <i>S. aureus</i> ; no anticancer evaluation; no anti-migratory study                                                                                                                           | <sup>3</sup> |

|   |                                    |                                                                                       |                                                 |                                                                   |                                                                                                                                                                                                                                                                                                                                                                   |   |
|---|------------------------------------|---------------------------------------------------------------------------------------|-------------------------------------------------|-------------------------------------------------------------------|-------------------------------------------------------------------------------------------------------------------------------------------------------------------------------------------------------------------------------------------------------------------------------------------------------------------------------------------------------------------|---|
| 5 | AgNPs                              | Cluster-like/agglomerated; mostly spherical/oval particles, <b>16–22 nm</b> by HR-TEM | <i>Momordica cymbalaria</i> leaf extract        | Antioxidant, cytotoxicity, antibacterial, photocatalytic activity | DPPH inhibition <b>67.77% at 1000 <math>\mu\text{g mL}^{-1}</math></b> ; $\text{IC}_{50}$ <b>54.89 <math>\mu\text{g mL}^{-1}</math></b> for MCF-7 and <b>160.74 <math>\mu\text{g mL}^{-1}</math></b> for Vero cells; maximum antibacterial zone <b>17.33 mm</b> against <i>E. coli</i> ; clustered AgNPs; no nanoflower/BET/migration correlation                 | 4 |
| 6 | Ag/AgCl NPs                        | Spherical and rod-shaped particles; <b>~20 and 75 nm</b>                              | <i>Durio zibethinus</i> seed extract            | Antibacterial, cytotoxicity, photocatalytic activity              | SPR at <b>420 nm</b> ; zeta potential <b>-15.41 mV</b> ; sunlight-assisted synthesis optimized at <b>4000 <math>\pm</math> 200 lux</b> ; evaluated for methylene blue degradation; Ag/AgCl mixed phase; no anti-migratory validation                                                                                                                              | 5 |
| 7 | AgNPs                              | Spherical/oval nanoparticles; average size <b>28.32 nm</b>                            | <i>Myrsine africana</i> leaf extract            | Antibacterial, antioxidant, phytotoxic activity                   | UV-Vis peak at <b>438 nm</b> ; highest antioxidant activity <b>57.7% at 40 <math>\mu\text{g mL}^{-1}</math></b> ; DPPH $\text{IC}_{50}$ <b>77.56 <math>\mu\text{g mL}^{-1}</math></b> ; stronger antibacterial activity against <i>E. coli</i> ; phytotoxic focus; no anticancer/photocatalytic integration                                                       | 6 |
| 8 | Ag-TiO <sub>2</sub> bimetallic NPs | Bimetallic nanoparticles; <b>10–60 nm</b>                                             | <i>Pluchea indica</i> leaf extract              | Anticancer, antibacterial, antioxidant activity                   | $\text{IC}_{50}$ <b>33.5 <math>\mu\text{g mL}^{-1}</math></b> against MCF-7; $\text{IC}_{50}$ <b>169.6 <math>\mu\text{g mL}^{-1}</math></b> against Wi-38 normal cells; MIC <b>31.25–62.5 <math>\mu\text{g mL}^{-1}</math></b> ; antioxidant $\text{IC}_{50}$ <b>225 <math>\mu\text{g mL}^{-1}</math></b> , bimetallic system; no dye-degradation/migration study | 7 |
| 9 | AgNPs                              | Ag nanoparticles                                                                      | <i>Cucumis prophetarum</i> aqueous leaf extract | Antibacterial and antiproliferative activity                      | Antibacterial and antiproliferative activity against cancer cell lines; limited application window; no photocatalytic or anti-migratory assessment                                                                                                                                                                                                                | 8 |

|    |       |                                                                 |                                                   |                                                 |                                                                                                                                                                                                                                                                                                                              |               |
|----|-------|-----------------------------------------------------------------|---------------------------------------------------|-------------------------------------------------|------------------------------------------------------------------------------------------------------------------------------------------------------------------------------------------------------------------------------------------------------------------------------------------------------------------------------|---------------|
| 10 | AgNPs | Ag nanoparticles                                                | <i>Carissa carandas</i> leaf extract              | Antioxidant and antibacterial activity          | First report of <i>C. carandas</i> leaf-mediated AgNP synthesis for antioxidant and antibacterial activity; two-application scope; no anticancer/dye-degradation study                                                                                                                                                       | <sup>9</sup>  |
| 11 | AgNPs | Ag nanoparticles                                                | <i>Conocarpus lancifolius</i> fruit/plant extract | Antimicrobial and anticancer activity           | Plant extract used to synthesize AgNPs for antimicrobial and anticancer evaluation against drug-resistant infection-related concerns; no nanoflower structure; no photocatalytic remediation                                                                                                                                 | <sup>10</sup> |
| 12 | AgNPs | Small-sized AgNPs                                               | <i>Viburnum grandiflorum</i> leaf extract         | Antibacterial, antioxidant, anticancer activity | Biosynthesized AgNPs described as cost-effective and environmentally friendly, with antimicrobial and anticancer properties; no anti-migratory or dye-degradation validation                                                                                                                                                 | <sup>11</sup> |
| 13 | AgNPs | Predominantly spherical; average diameter ~ <b>20 nm</b> by TEM | <i>Brassica oleracea</i> leaf extract             | Antibacterial, antioxidant, anticancer activity | Maximum antibacterial zones: <b>14.33 ± 0.57 mm</b> against <i>S. epidermidis</i> and <b>12.0 ± 0.20 mm</b> against <i>P. aeruginosa</i> ; MCF-7 IC <sub>50</sub> <b>55 µg mL<sup>-1</sup></b> ; DPPH IC <sub>50</sub> ~ <b>50.37 µg mL<sup>-1</sup></b> ; spherical AgNPs; no AgNF morphology; no environmental remediation | <sup>12</sup> |
| 14 | AgNPs | Ag nanoparticles                                                | <i>Pandanus dubius</i> extract                    | Antioxidant, antibacterial, anticancer activity | UV–Vis absorption peak <b>458 nm</b> ; FTIR identified functional groups involved in reduction/stabilization; limited mechanistic/functional integration; no anti-migratory or dye-degradation study                                                                                                                         | <sup>13</sup> |
| 15 | AgNPs | Ag nanoparticles                                                | <i>Ammi visnaga</i> extract                       | Antibacterial, antibiofilm, anticancer,         | <b>99% inhibition</b> against biofilm/bacteria; anticancer IC <sub>50</sub> <b>17.1 ± 0.6 µg mL<sup>-1</sup></b> ; Eosin Y photodegradation                                                                                                                                                                                  | <sup>14</sup> |

|    |       |                                                            |                                                    |                                                                    |                                                                                                                                                                                                                               |               |
|----|-------|------------------------------------------------------------|----------------------------------------------------|--------------------------------------------------------------------|-------------------------------------------------------------------------------------------------------------------------------------------------------------------------------------------------------------------------------|---------------|
|    |       |                                                            |                                                    | Eosin Y photodegradation                                           | up to <b>50%</b> ; AgNP system; no nanoflower/BET-supported architecture; no migration assay                                                                                                                                  |               |
| 16 | AgNPs | Ag nanoparticles                                           | <i>Aegle marmelos</i> leaf extract                 | Antimicrobial, antioxidant, anticancer, photocatalytic degradation | Integrated antimicrobial, antioxidant, anticancer, and photocatalytic degradation activity; conventional AgNPs; no hierarchical AgNF structure; no anti-migratory study                                                       | <sup>15</sup> |
| 17 | AgNPs | Ag nanoparticles                                           | <i>Acer oblongifolium</i> plant extract            | Antibacterial, antioxidant, antiproliferative activity             | Reported IC <sub>50</sub> values against MCF-7 and HeLa after 48–72 h, with values listed as <b>9.43 and 6.22 µg mL<sup>-1</sup></b> in the accessible text; antiproliferative focus; no photocatalytic/migration integration | <sup>16</sup> |
| 18 | AgNPs | Round AgNPs; <b>50–90 nm</b>                               | <i>Lantana camara</i> leaf extract                 | Antibacterial and anticancer activity                              | IC <sub>50</sub> <b>49.52 µg mL<sup>-1</sup></b> against A549 and <b>46.67 µg mL<sup>-1</sup></b> against MCF-7; round AgNPs; antibacterial–anticancer only; no dye-degradation study                                         | <sup>17</sup> |
| 19 | AgNPs | Ag nanoparticles                                           | <i>Justicia brandegeana</i> aqueous extract        | Antibacterial, antioxidant, anticancer activity                    | Reported as a green-synthesized AgNP system for combined antibacterial, antioxidant, and anticancer evaluation; no nanoflower morphology; no anti-migratory/photocatalytic validation                                         | <sup>18</sup> |
| 20 | AgNPs | Ag nanoparticles                                           | <i>Odontosoria chinensis</i> leaves                | Antibacterial, antioxidant, anticancer activity                    | Synergistic antibacterial effects, antioxidant potential, and anticancer activity; AgNP structure; no environmental remediation or migration assay                                                                            | <sup>19</sup> |
| 21 | AgNPs | Ag nanoparticles; <b>50–110 nm</b> , average <b>~70 nm</b> | <i>Elaeocarpus serratus</i> / Ceylon olive extract | Antibacterial activity                                             | AgNPs in the 50–110 nm range; proteins, phenols, and flavonoids involved in reduction/capping;                                                                                                                                | <sup>20</sup> |

|    |                       |                            |                                            |                                                             |                                                                                                                                                                                    |               |
|----|-----------------------|----------------------------|--------------------------------------------|-------------------------------------------------------------|------------------------------------------------------------------------------------------------------------------------------------------------------------------------------------|---------------|
|    |                       |                            |                                            |                                                             | antibacterial-only scope; no multifunctional biological–environmental testing                                                                                                      |               |
| 22 | AgNPs                 | Ag nanoparticles           | <i>Melaleuca alternifolia</i> leaf extract | Antibacterial, antifungal, antioxidant, anticancer activity | Tea-tree-leaf-mediated AgNPs with antibacterial, antifungal, antioxidant, and anticancer activities; no photocatalytic dye decolorization; no anti-migratory assessment            | <sup>21</sup> |
| 23 | AgNPs                 | Ag nanoparticles           | <i>Barleria gibsonii</i> extract           | Antibacterial, antioxidant, cytotoxic, catalytic activity   | <i>B. gibsonii</i> -AgNPs with antibacterial, antioxidant, cytotoxic, and catalytic activities; conventional AgNPs; no AgNF morphology; no CV decolorization/migration integration | <sup>22</sup> |
| 24 | Ag <sub>2</sub> O NPs | Silver oxide nanoparticles | <i>Eruca sativa</i> extract                | Biological activities                                       | <i>E. sativa</i> -mediated Ag <sub>2</sub> O nanoparticles with biological activity; silver oxide phase; no metallic AgNF architecture; no biomedical–photocatalytic integration   | <sup>23</sup> |
| 25 | AgNPs                 | Ag nanoparticles           | <i>Alcea rosea</i> leaf aqueous extract    | Biological activities                                       | <i>Alcea rosea</i> -mediated AgNPs with biological activity; conventional AgNPs; no AgNF morphology; no BET/migration/CV-decolorization study                                      | <sup>24</sup> |

**Table S2. Structural parameters calculated from XRD peaks of TD-AgNFs**

| <b>Plane (hkl)</b> | <b>2 theta (deg)</b> | <b>FWHM (2theta)</b> | <b>FWHM (rad)</b> | <b>d-spacing (Å)</b> | <b>Crystalline size (nm)</b> | <b>Lattice parameter (Å)</b> | <b>Micro strain (<math>\epsilon</math>)</b> | <b>Dislocation density (<math>m^{-2}</math>)</b> |
|--------------------|----------------------|----------------------|-------------------|----------------------|------------------------------|------------------------------|---------------------------------------------|--------------------------------------------------|
| <b>(111)</b>       | 37.98                | 0.6927               | 0.01209           | 2.3835               | 12.1                         | 4.10                         | $8.86 \times 10^{-3}$                       | $6.83 \times 10^{15}$                            |
| <b>(200)</b>       | 44.17                | 0.5196               | 0.00907           | 2.0482               | 16.8                         | 4.09                         | $5.6 \times 10^{-3}$                        | $3.5 \times 10^{15}$                             |
| <b>(220)</b>       | 64.35                | 0.5196               | 0.00907           | 1.4477               | 18.7                         | 4.08                         | $3.5 \times 10^{-3}$                        | $2.9 \times 10^{15}$                             |
| <b>(311)</b>       | 77.32                | 0.5196               | 0.00907           | 1.2346               | 20.4                         | 4.11                         | $2.8 \times 10^{-3}$                        | $2.4 \times 10^{15}$                             |

## Supporting Reference

- 1 G. A. Molina, R. Esparza, J. L. López-Miranda, A. R. Hernández-Martínez, B. L. España-Sánchez, E. A. Elizalde-Peña and M. Estevez, *Colloids Surf. B. Biointerfaces*, 2019, **180**, 141–149.
- 2 S. De Mel, J. Gruenler, L. Khoury, A. Heynes, J. Fazekas, K. Damaske, T. Galbadage, R. S. Gunasekera and R. S. Anderson, *Sci. Rep.*, 2025, **15**, 23709.
- 3 N. A. Dar, P. A. Dar, M. Qadir and W. A. Shah, *Sci. Rep.*, 2025, **15**, 29673.
- 4 M. Sundar, G. Rajagopal, A. Nivetha, S. Prabu Kumar and S. Muthukumar, 2024, DOI: 10.3390/separations11020061.
- 5 S. Sumitha, S. Vasanthi, S. Shalini, S. V Chinni, S. C. B. Gopinath, P. Anbu, M. B. Bahari, R. Harish, S. Kathiresan and V. Ravichandran, 2018, DOI: 10.3390/molecules23123311.
- 6 Q. Sarwer, M. S. Amjad, A. Mehmood, Z. Binish, G. Mustafa, A. Farooq, M. F. Qaseem, F. Abasi and J. M. Pérez de la Lastra, 2022, DOI: 10.3390/molecules27217612.
- 7 S. Selim, B. M. Badr, M. H. Moustafa, E. Saied, F. M. Elkady, A. salama, A. S. Aloufi, N. A. Algamdi, N. N. Alzahofi, E. Abada, M. S. Alshammari, S. K. Al Jaouni and A. H. Hashem, *Sci. Rep.*, 2025, **15**, 26735.
- 8 Hemlata, P. R. Meena, A. P. Singh and K. K. Tejavath, *ACS Omega*, 2020, **5**, 5520–5528.
- 9 R. Singh, C. Hano, G. Nath and B. Sharma, 2021, DOI: 10.3390/biom11020299.
- 10 M. Oves, M. Ahmar Rauf, M. Aslam, H. A. Qari, H. Sonbol, I. Ahmad, G. Sarwar Zaman and M. Saeed, *Saudi J. Biol. Sci.*, 2022, **29**, 460–471.
- 11 H. Talib, A. Mehmood, M. S. Amjad, A. Mustafa, M. A. R. Khan, M. Raffi, R. T. Khan, K. S. Ahmad and H. Qureshi, *Bot. Stud.*, 2024, **65**, 4.
- 12 S. Ansar, H. Tabassum, N. S. M. Aladwan, M. Naiman Ali, B. Almaarik, S. AlMahrouqi, M. Abudawood, N. Banu and R. Alsubki, *Sci. Rep.*, 2020, **10**, 18564.
- 13 S. Velmani, E. N. Sholkamy, P. Ruba, S. Kanaga, V. Balamurugan, M. A. Tarighat and G. Abdi, *Sci. Rep.*, 2025, **15**, 39940.
- 14 U. Farooq, A. K. Qureshi, H. Noor, M. Farhan, M. E. Khan, O. A. Hamed, A. H. Bashiri and W. Zakri, 2023, DOI: 10.3390/plants12122337.
- 15 P. Rama, P. Mariselvi, R. Sundaram and K. Muthu, *Heliyon*, DOI:10.1016/j.heliyon.2023.e16277.
- 16 M. Naveed, B. Bukhari, T. Aziz, S. Zaib, M. A. Mansoor, A. A. Khan, M. Shahzad, A. S. Dabool, M. W. Alruways, A. A. Almalki, A. S. Alamri and M. Alhomrani, *Molecules*, DOI:10.3390/molecules27134226.
- 17 L. V Hublikar, S. V Ganachari, V. B. Patil, S. Nandi and A. Honnad, *Prog. Biomater.*, DOI:10.1007/s40204-023-00219-9.

- 18 N. M. Alassadi, G. J. Al-Ghizzawi, A. M. Amshawee and R. Ali, *Next Nanotechnol.*, 2025, **8**, 100275.
- 19 S. Ghosh and S. N. Sinha, *Next Nanotechnol.*, 2025, **8**, 100316.
- 20 K. M. Fernando, C. A. Gunathilake, C. Yalagama, U. K. Samarakoon, C. A. N. Fernando, G. Weerasinghe, G. K. Pamunuwa, I. Soliman, N. Ghulamullah, S. M. Rajapaksha and O. Fatani, 2024, DOI: 10.3390/jcs8020043.
- 21 B. M. Dayana, R. Venkatesan, J. T. Joseph Prakash, P. Saravanan, M. S. Nivetha, A. Murali, A. A. Vetcher, M. Settu and S.-C. Kim, *Sci. Rep.*, 2026, **16**, 2574.
- 22 S. S. M. Ali, K. Dharmadhikari, K. I. Saiyed, H. Vasava, M. A. Jowhari and P. Robin, *Sci. Rep.*, 2026, **16**, 8281.
- 23 F. Gul, Z. Ullah, J. Iqbal, B. A. Abbasi, S. Ali, S. Kanwal, J. Uddin, M. Kazi and T. Mahmood, *Sci. Rep.*, 2025, **15**, 13466.
- 24 I. Ojha, P. S. Saud, D. R. Jaishi, Y. R. Rosyara, A. Ojha, N. R. Devi, P. R. Joshi and H. R. Pant, *Sci. Rep.*, 2026, **16**, 6693.
